# Supplementary material for: Potential impact of cuproptosis-related genes on tumor immunity in esophageal carcinoma
Source: publisher site journal article supplement (doi:10.18632/aging.205391), 2023-12-30
Supplement: Supplementary file [file aging-v15i24-205391-supplementary-material-SD2.pdf]

## SUPPLEMENTARY TABLES

**Supplementary Table 1. 27 cuproptosis-related genes (CRGs) were extracted from the reports by Tsvetkov and the MsigDB.**

| <b>27 cuproptosis-related genes (CRGs)</b> |       |         |
|--------------------------------------------|-------|---------|
| SLC25A5                                    | CP    | SLC23A2 |
| NDUFB2                                     | DLD   | PDHX    |
| DLST                                       | LIAS  | ATP7B   |
| NDUFA1                                     | COX7B | NDUFA2  |
| SLC31A1                                    | FDX1  | SLC6A3  |
| LIPT1                                      | DLAT  | PIH1D2  |
| MITD1                                      | ATP7A | CCS     |
| LIPT2                                      | ATOX1 | NDUFB1  |
| SLC22A5                                    | PDHB  | GLS     |

**Supplementary Table 2. 7 CRGs specific primers.**

| <b>7 CRGs specific primers</b> |                               |                               |
|--------------------------------|-------------------------------|-------------------------------|
| <b>CRGs</b>                    | <b>Forward primer (5'-3')</b> | <b>Reverse primer (5'-3')</b> |
| SLC6A3                         | GAGAGAACACGAACAAACC           | TTACAAACACAAGACA              |
| MITD1                          | UAGCGCUGGACCGGTCA             | AGCTCACGGAGTGGTTCAACT         |
| CCS                            | GGGAACTATTGACGGCCTGG          | GTCAGCATCAGCACGGACAT          |
| LIPT2                          | CGTGGTTTGAGCACATCG            | AAGGCCACAAGGAAAGGTG           |
| ATOX1                          | GTGCTGAAGCTGTCTCTCGG          | GCCCAAGGTAGGTAGGAAACAGTCTTT   |
| PDHB                           | CTCAGCACTCGCAATGCTTC          | AAGTCCTTTCGCATCCTCGG          |
| GLS                            | AGGGTCTGTTACCTAGCTTGG         | ACGTTGCAATCCTGTAGATTT         |
| GAPDH                          | AGGTCGGTGTGAACGGATTTG         | TGTAGACCATGTAGTTGAGGTCA       |
